# Supplementary material for: Individual Differences in Behavioural Despair Predict Brain GSK-3beta Expression in Mice: The Power of a Modified Swim Test
Source: Hindawi journal article supplement (doi:10.1155/2016/5098591), 2016-01-01
Supplement: f2 [file 5098591.f2.pdf]

Modified swim test: adding a delayed session to the classic Porsolt test

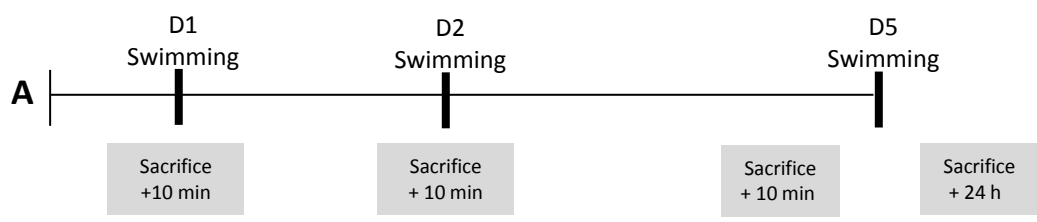

Modified protocol of swim test: impact of context, swimming and timing

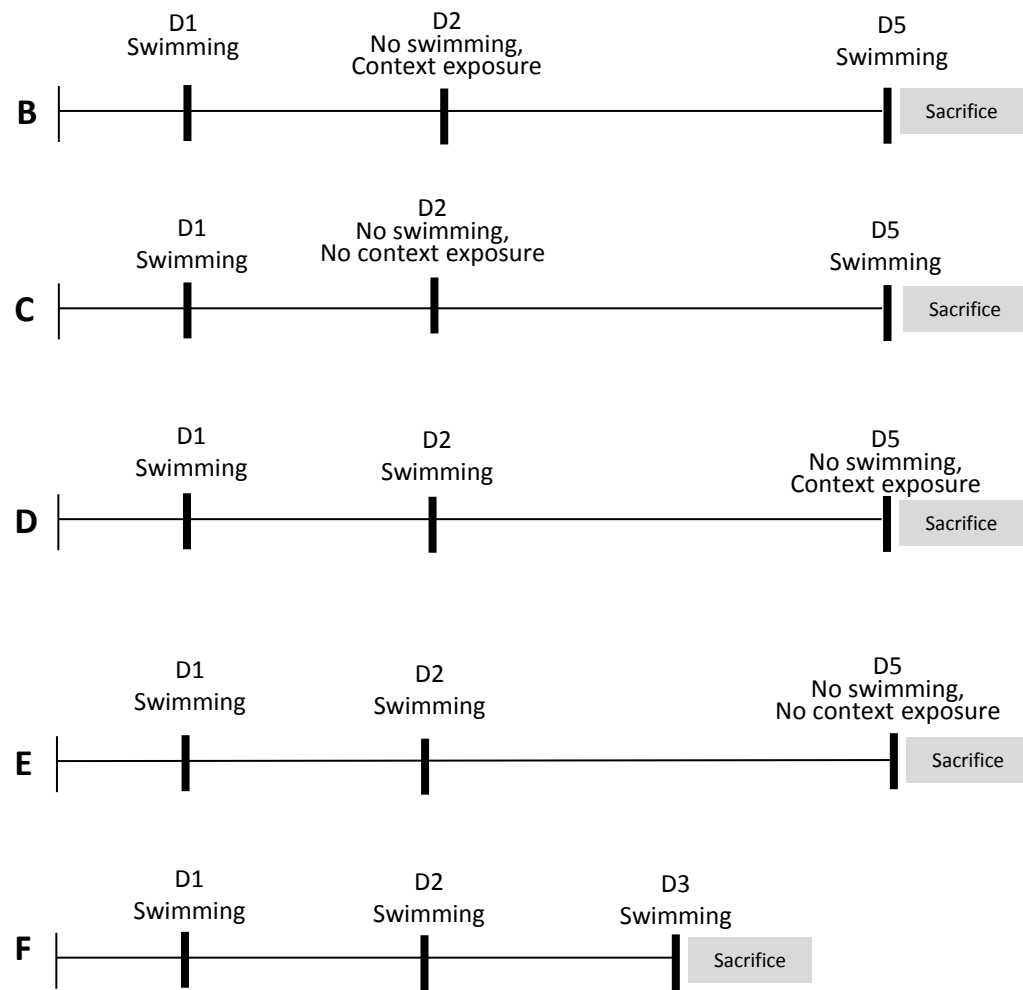

Modified swim test and effects of low dose of imipramine

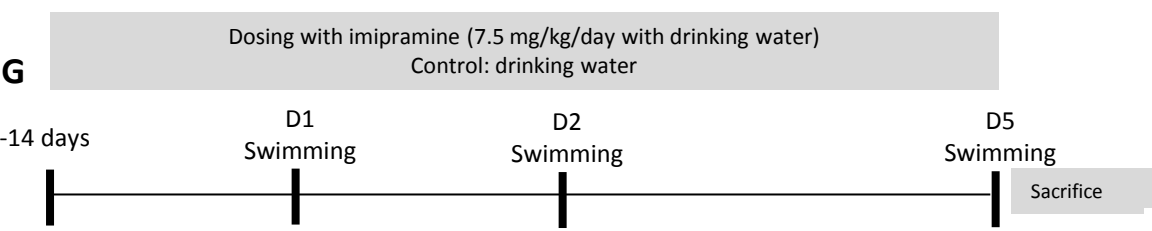

**Figure 1**

## DYNAMICS OF FLOATING

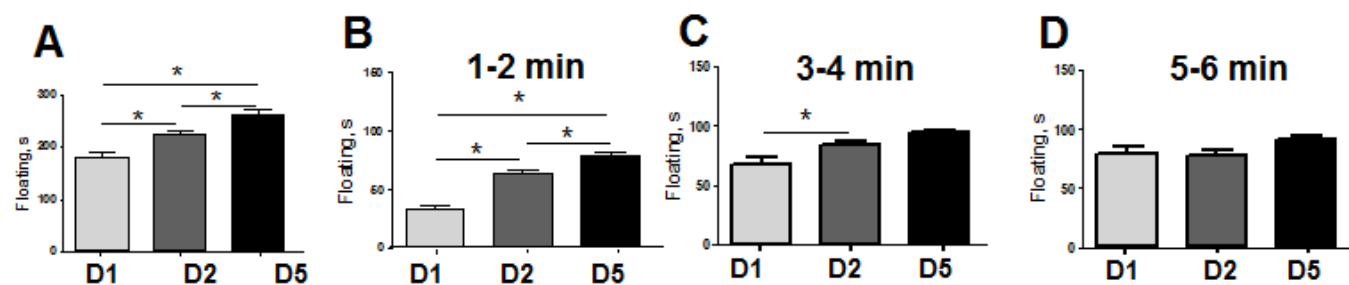

## THE IMPACT OF CONTEXT, SWIMMING AND TIMING IN FLOATING

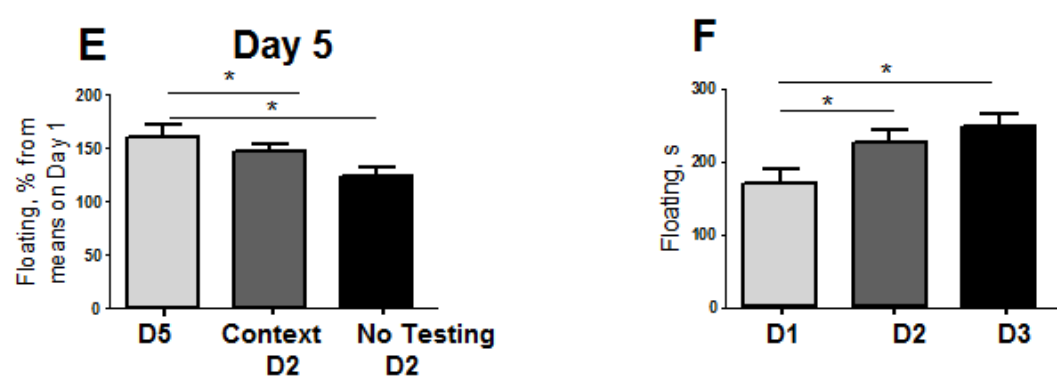

**Figure 2**

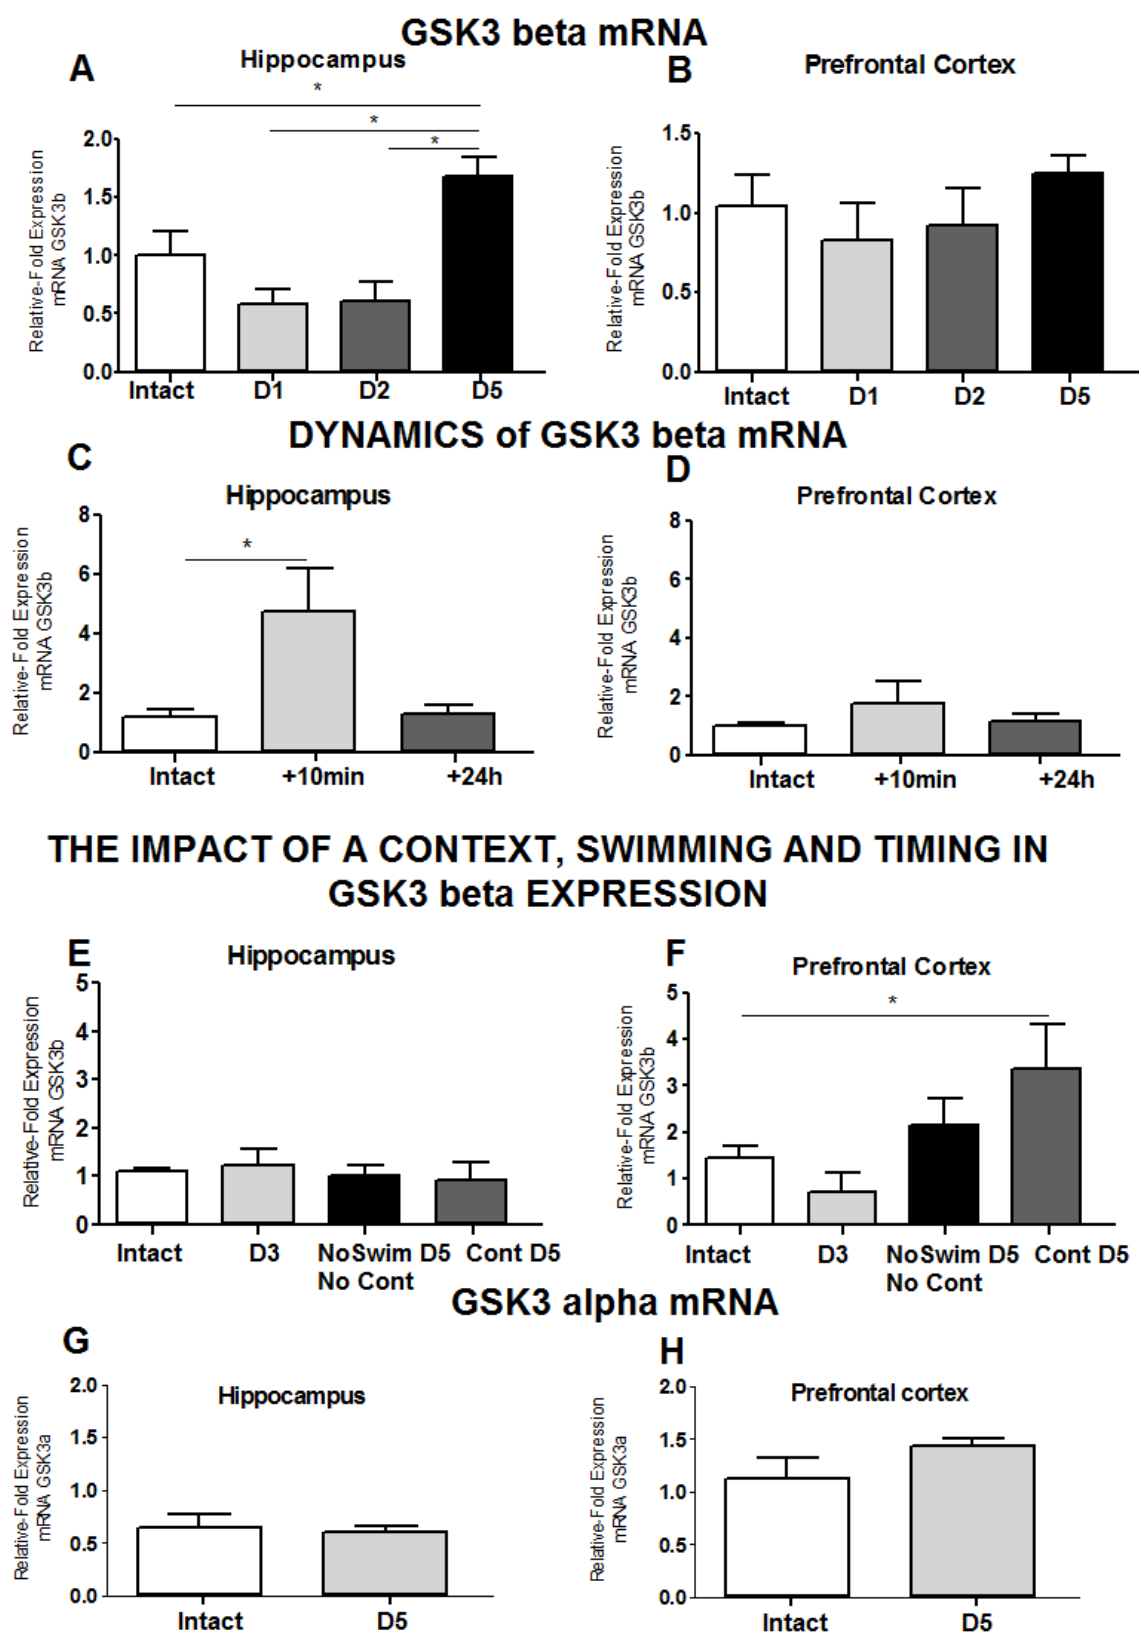

**Figure 3**

## TOTAL LEVELS OF GSK3 beta

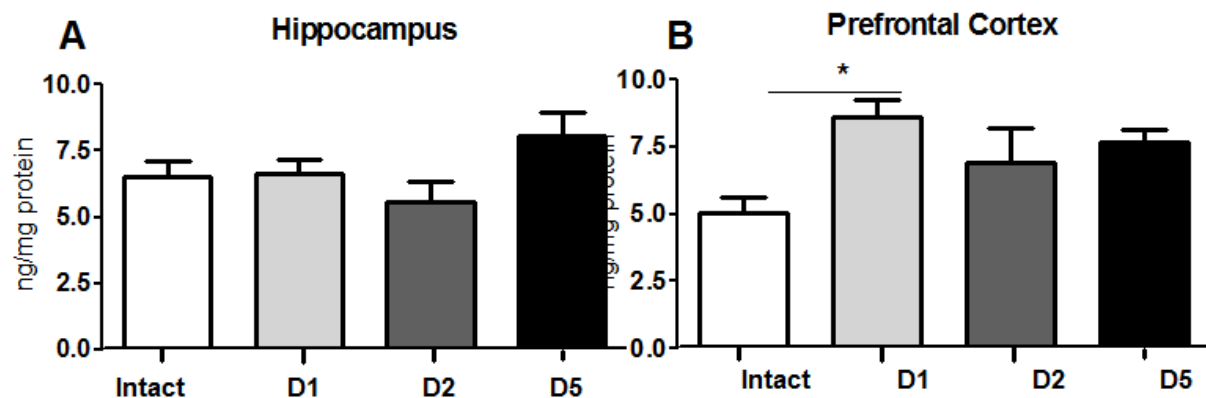

## pS9- GSK3 beta

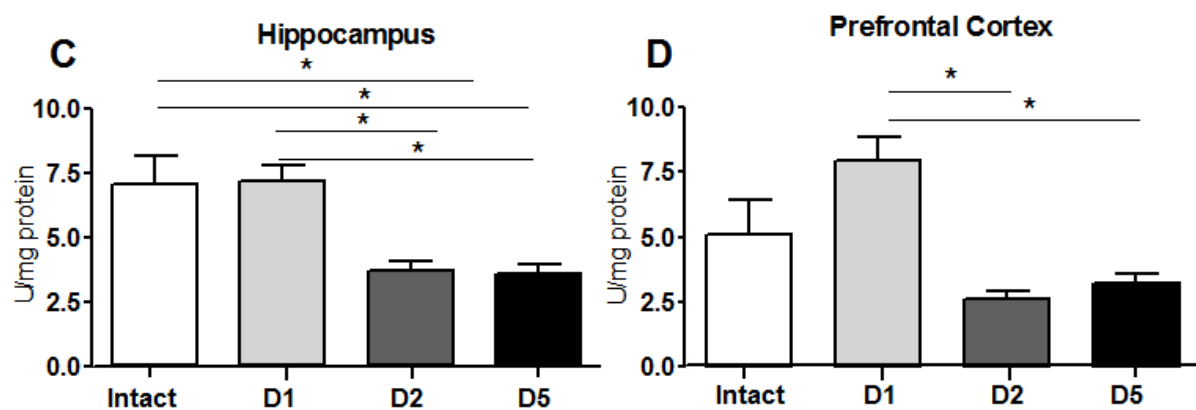

## RATIO pS9- GSK3 beta: TOTAL GSK3 beta

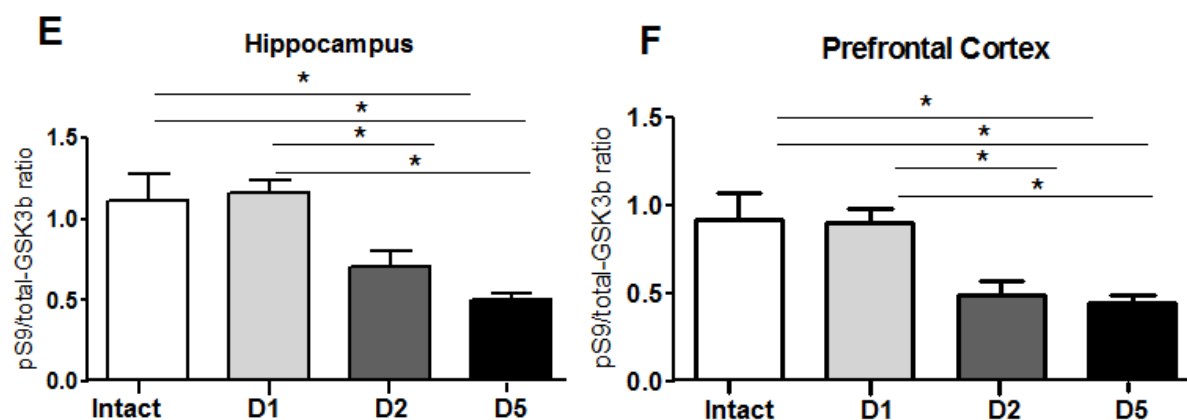

**Figure 4**

## GSK3 beta mRNA

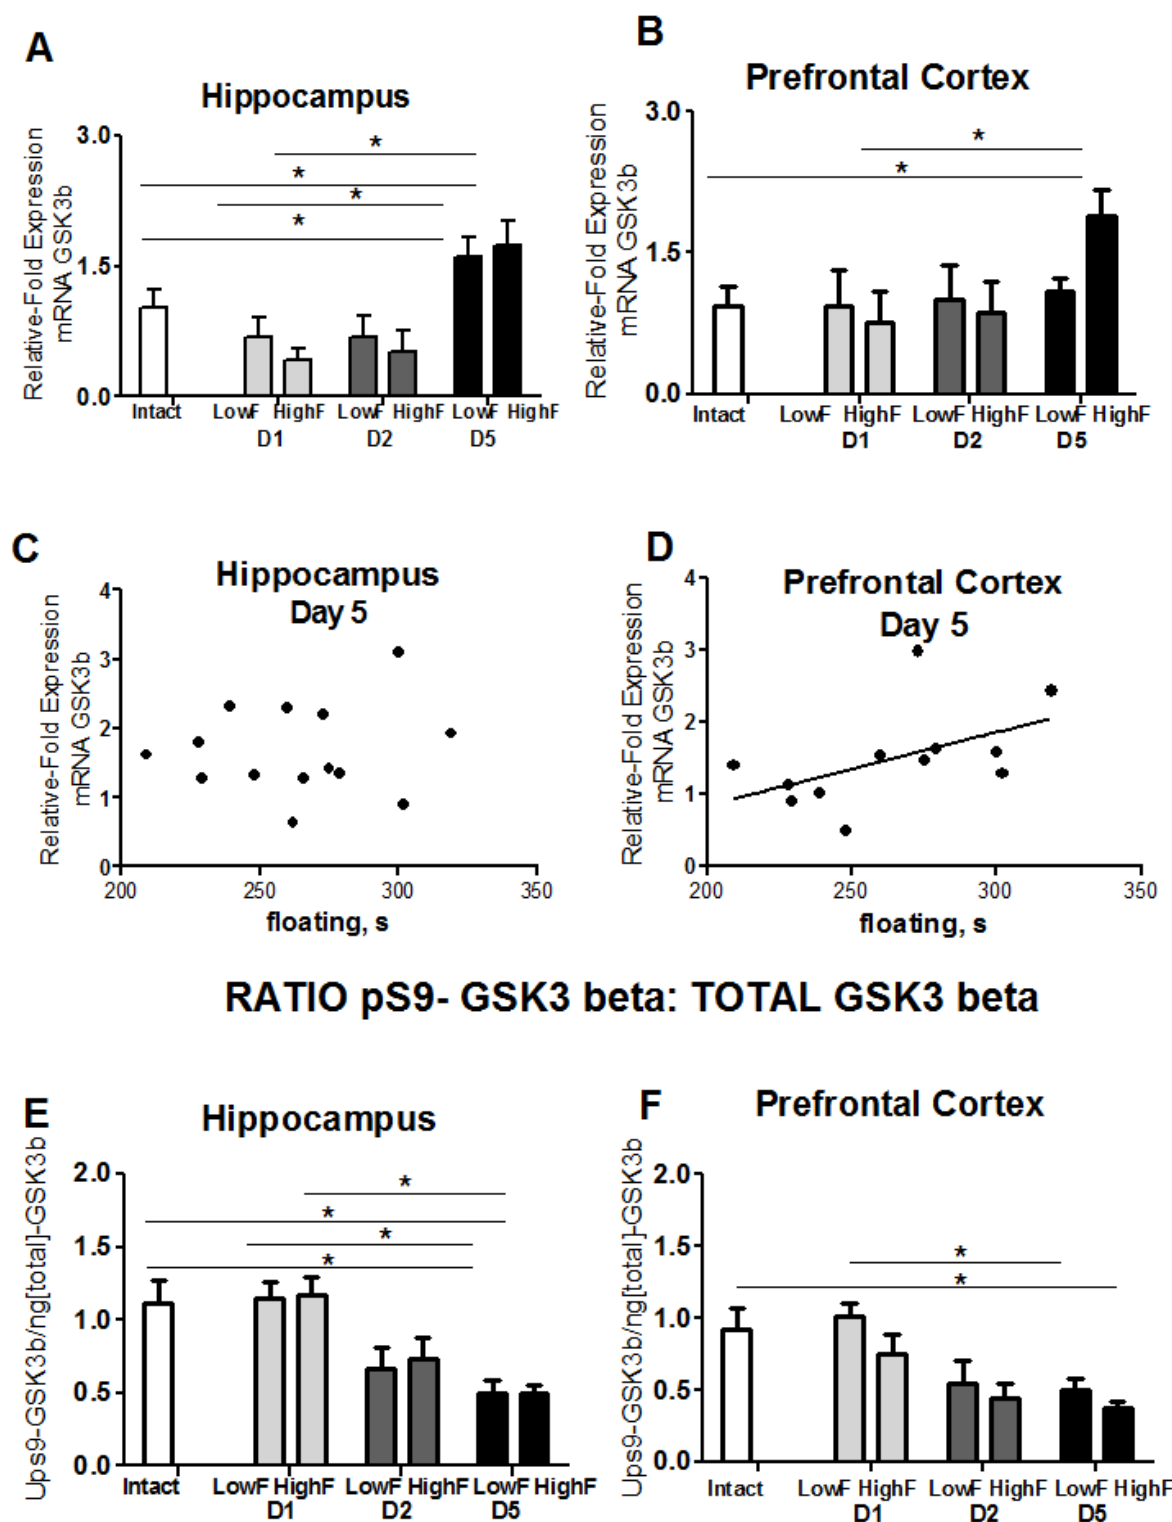

**Figure 5**

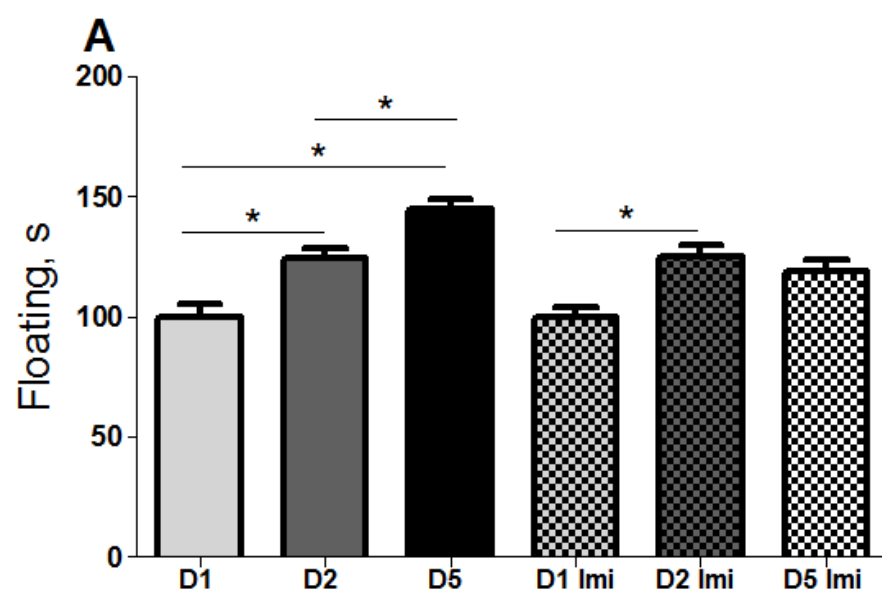

### GSK3 beta mRNA

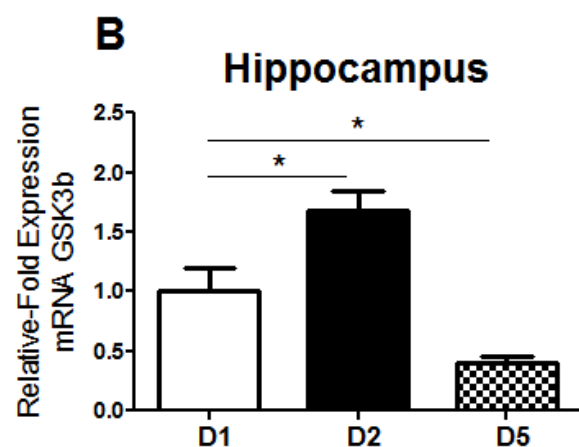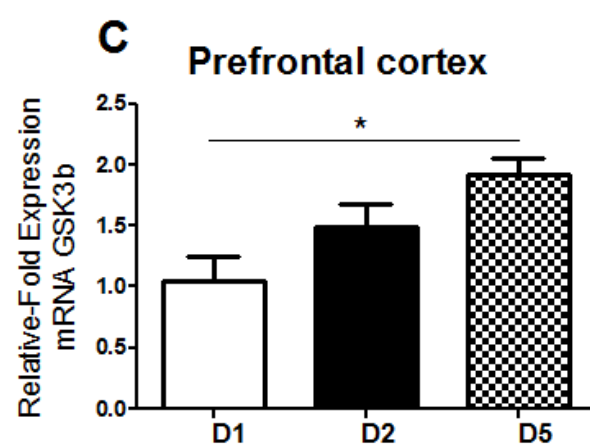

### RATIO pS9- GSK3 beta: TOTAL GSK3 beta

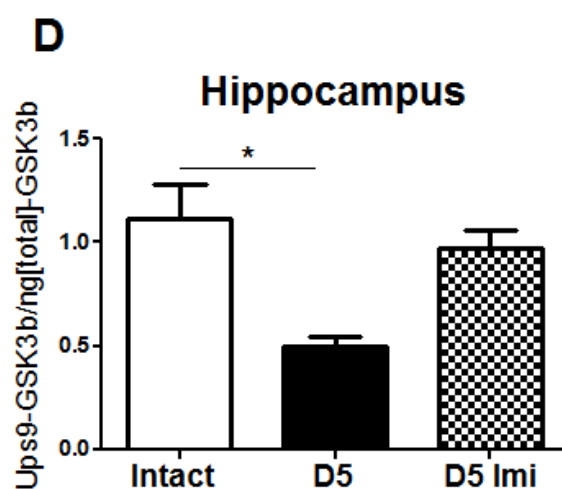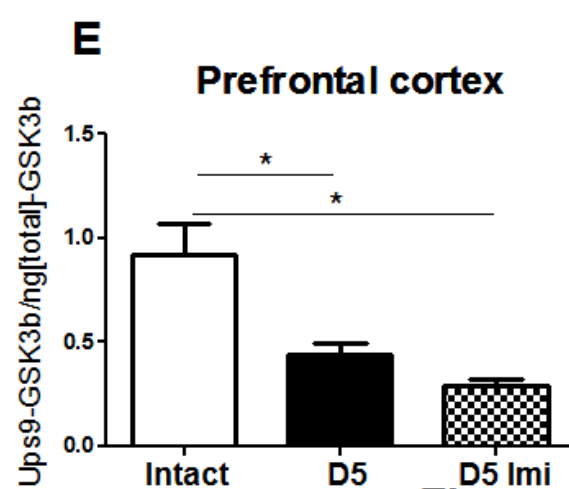

**Figure 6**
